# Supplementary material for: The iterative process of fluid biomarker development and validation in Alzheimer's disease
Source: PubMed Central journal article supplement — Alzheimers Dement (Amst). 2022 Jul 12;14(1):e12341. doi: 10.1002/dad2.12341 (PMC9274795; doi:10.1002/dad2.12341), 2022-07-12
Supplement: DAD2-14-e12341-s001.pdf [file DAD2-14-e12341-s001.pdf]

## ICMJE DISCLOSURE FORM

Date: 2022-06-14

Your Name: Barbara B Bendlin

Manuscript Title: The iterative process of fluid biomarker development and validation in Alzheimer’s disease

Manuscript number (if known): DADM-D-22-00095

In the interest of transparency, we ask you to disclose all relationships/activities/interests listed below that are related to the content of your manuscript. “Related” means any relation with for-profit or not-for-profit third parties whose interests may be affected by the content of the manuscript. Disclosure represents a commitment to transparency and does not necessarily indicate a bias. If you are in doubt about whether to list a relationship/activity/interest, it is preferable that you do so.

The following questions apply to the author’s relationships/activities/interests as they relate to the **current manuscript only**.

The author’s relationships/activities/interests should be **defined broadly**. For example, if your manuscript pertains to the epidemiology of hypertension, you should declare all relationships with manufacturers of antihypertensive medication, even if that medication is not mentioned in the manuscript.

In item #1 below, report all support for the work reported in this manuscript without time limit. For all other items, the time frame for disclosure is the past 36 months.

|                                                           | <b>Name all entities with whom you have this relationship or indicate none (add rows as needed)</b>                                     | <b>Specifications/Comments (e.g., if payments were made to you or to your institution)</b>                                                                                                                                                                                                                                                                              |  |                               |  |  |  |                                           |
|-----------------------------------------------------------|-----------------------------------------------------------------------------------------------------------------------------------------|-------------------------------------------------------------------------------------------------------------------------------------------------------------------------------------------------------------------------------------------------------------------------------------------------------------------------------------------------------------------------|--|-------------------------------|--|--|--|-------------------------------------------|
| <b>Time frame: Since the initial planning of the work</b> |                                                                                                                                         |                                                                                                                                                                                                                                                                                                                                                                         |  |                               |  |  |  |                                           |
| <b>1</b>                                                  | All support for the present manuscript (e.g., funding, provision of study materials, medical writing, article processing charges, etc.) | <input checked="" type="checkbox"/> <b>None</b><br><br><table border="1" style="width: 100%; border-collapse: collapse;"> <tr> <td style="width: 60%;"></td> <td style="width: 40%;">Payments made to Institution.</td> </tr> <tr> <td></td> <td></td> </tr> <tr> <td></td> <td style="font-size: small;">Click the tab key to add additional rows.</td> </tr> </table> |  | Payments made to Institution. |  |  |  | Click the tab key to add additional rows. |
|                                                           | Payments made to Institution.                                                                                                           |                                                                                                                                                                                                                                                                                                                                                                         |  |                               |  |  |  |                                           |
|                                                           |                                                                                                                                         |                                                                                                                                                                                                                                                                                                                                                                         |  |                               |  |  |  |                                           |
|                                                           | Click the tab key to add additional rows.                                                                                               |                                                                                                                                                                                                                                                                                                                                                                         |  |                               |  |  |  |                                           |

|                                   |                                                                                           | Name all entities with whom you have this relationship or indicate none (add rows as needed) | Specifications/Comments (e.g., if payments were made to you or to your institution) |
|-----------------------------------|-------------------------------------------------------------------------------------------|----------------------------------------------------------------------------------------------|-------------------------------------------------------------------------------------|
|                                   | <b>No time limit for this item.</b>                                                       |                                                                                              |                                                                                     |
| <b>Time frame: past 36 months</b> |                                                                                           |                                                                                              |                                                                                     |
| <b>2</b>                          | Grants or contracts from any entity (if not indicated in item #1 above).                  | <input type="checkbox"/> <b>None</b>                                                         |                                                                                     |
|                                   |                                                                                           | BBB has received precursors and imaging agents from Avid Radiopharmaceuticals.               | Payments made to Institution                                                        |
|                                   |                                                                                           |                                                                                              |                                                                                     |
|                                   |                                                                                           |                                                                                              |                                                                                     |
| <b>3</b>                          | Royalties or licenses                                                                     | <input checked="" type="checkbox"/> <b>None</b>                                              |                                                                                     |
|                                   |                                                                                           |                                                                                              |                                                                                     |
|                                   |                                                                                           |                                                                                              |                                                                                     |
|                                   |                                                                                           |                                                                                              |                                                                                     |
| <b>4</b>                          | Consulting fees                                                                           | <input checked="" type="checkbox"/> <b>None</b>                                              |                                                                                     |
|                                   |                                                                                           |                                                                                              |                                                                                     |
|                                   |                                                                                           |                                                                                              |                                                                                     |
|                                   |                                                                                           |                                                                                              |                                                                                     |
| <b>5</b>                          | Payment or honoraria for lectures, presentations, speakers bureaus, manuscript writing or | <input checked="" type="checkbox"/> <b>None</b>                                              |                                                                                     |
|                                   |                                                                                           |                                                                                              |                                                                                     |
|                                   |                                                                                           |                                                                                              |                                                                                     |
|                                   |                                                                                           |                                                                                              |                                                                                     |

|    | Name all entities with whom you have this relationship or indicate none (add rows as needed) | Specifications/Comments (e.g., if payments were made to you or to your institution)                                                                                                               |  |  |  |  |  |  |
|----|----------------------------------------------------------------------------------------------|---------------------------------------------------------------------------------------------------------------------------------------------------------------------------------------------------|--|--|--|--|--|--|
|    | education al events                                                                          |                                                                                                                                                                                                   |  |  |  |  |  |  |
| 6  | Payment for expert testimony                                                                 | <input checked="" type="checkbox"/> <b>None</b><br><table border="1" data-bbox="472 548 1385 663"> <tr><td></td><td></td></tr> <tr><td></td><td></td></tr> <tr><td></td><td></td></tr> </table>   |  |  |  |  |  |  |
|    |                                                                                              |                                                                                                                                                                                                   |  |  |  |  |  |  |
|    |                                                                                              |                                                                                                                                                                                                   |  |  |  |  |  |  |
|    |                                                                                              |                                                                                                                                                                                                   |  |  |  |  |  |  |
| 7  | Support for attending meetings and/or travel                                                 | <input checked="" type="checkbox"/> <b>None</b><br><table border="1" data-bbox="472 762 1385 877"> <tr><td></td><td></td></tr> <tr><td></td><td></td></tr> <tr><td></td><td></td></tr> </table>   |  |  |  |  |  |  |
|    |                                                                                              |                                                                                                                                                                                                   |  |  |  |  |  |  |
|    |                                                                                              |                                                                                                                                                                                                   |  |  |  |  |  |  |
|    |                                                                                              |                                                                                                                                                                                                   |  |  |  |  |  |  |
| 8  | Patents planned, issued or pending                                                           | <input checked="" type="checkbox"/> <b>None</b><br><table border="1" data-bbox="472 1018 1385 1134"> <tr><td></td><td></td></tr> <tr><td></td><td></td></tr> <tr><td></td><td></td></tr> </table> |  |  |  |  |  |  |
|    |                                                                                              |                                                                                                                                                                                                   |  |  |  |  |  |  |
|    |                                                                                              |                                                                                                                                                                                                   |  |  |  |  |  |  |
|    |                                                                                              |                                                                                                                                                                                                   |  |  |  |  |  |  |
| 9  | Participation on a Data Safety Monitoring Board or Advisory Board                            | <input checked="" type="checkbox"/> <b>None</b><br><table border="1" data-bbox="472 1232 1385 1348"> <tr><td></td><td></td></tr> <tr><td></td><td></td></tr> <tr><td></td><td></td></tr> </table> |  |  |  |  |  |  |
|    |                                                                                              |                                                                                                                                                                                                   |  |  |  |  |  |  |
|    |                                                                                              |                                                                                                                                                                                                   |  |  |  |  |  |  |
|    |                                                                                              |                                                                                                                                                                                                   |  |  |  |  |  |  |
| 10 | Leadership or fiduciary role in other board, society, committee or advocacy                  | <input checked="" type="checkbox"/> <b>None</b><br><table border="1" data-bbox="472 1564 1385 1680"> <tr><td></td><td></td></tr> <tr><td></td><td></td></tr> <tr><td></td><td></td></tr> </table> |  |  |  |  |  |  |
|    |                                                                                              |                                                                                                                                                                                                   |  |  |  |  |  |  |
|    |                                                                                              |                                                                                                                                                                                                   |  |  |  |  |  |  |
|    |                                                                                              |                                                                                                                                                                                                   |  |  |  |  |  |  |

|                                                                                                                                                                                                                                                               |                                                                                  | Name all entities with whom you have this relationship or indicate none (add rows as needed)                                                                                                                                                                                                                         | Specifications/Comments (e.g., if payments were made to you or to your institution) |  |  |  |  |  |  |
|---------------------------------------------------------------------------------------------------------------------------------------------------------------------------------------------------------------------------------------------------------------|----------------------------------------------------------------------------------|----------------------------------------------------------------------------------------------------------------------------------------------------------------------------------------------------------------------------------------------------------------------------------------------------------------------|-------------------------------------------------------------------------------------|--|--|--|--|--|--|
|                                                                                                                                                                                                                                                               | group, paid or unpaid                                                            |                                                                                                                                                                                                                                                                                                                      |                                                                                     |  |  |  |  |  |  |
| 1<br>1                                                                                                                                                                                                                                                        | Stock or stock options                                                           | <input checked="" type="checkbox"/> <b>None</b><br><table border="1" style="width: 100%; border-collapse: collapse;"> <tr><td style="width: 60%; height: 20px;"></td><td style="width: 40%;"></td></tr> <tr><td style="height: 20px;"></td><td></td></tr> <tr><td style="height: 20px;"></td><td></td></tr> </table> |                                                                                     |  |  |  |  |  |  |
|                                                                                                                                                                                                                                                               |                                                                                  |                                                                                                                                                                                                                                                                                                                      |                                                                                     |  |  |  |  |  |  |
|                                                                                                                                                                                                                                                               |                                                                                  |                                                                                                                                                                                                                                                                                                                      |                                                                                     |  |  |  |  |  |  |
|                                                                                                                                                                                                                                                               |                                                                                  |                                                                                                                                                                                                                                                                                                                      |                                                                                     |  |  |  |  |  |  |
| 1<br>2                                                                                                                                                                                                                                                        | Receipt of equipment, materials, drugs, medical writing, gifts or other services | <input checked="" type="checkbox"/> <b>None</b><br><table border="1" style="width: 100%; border-collapse: collapse;"> <tr><td style="width: 60%; height: 20px;"></td><td style="width: 40%;"></td></tr> <tr><td style="height: 20px;"></td><td></td></tr> <tr><td style="height: 20px;"></td><td></td></tr> </table> |                                                                                     |  |  |  |  |  |  |
|                                                                                                                                                                                                                                                               |                                                                                  |                                                                                                                                                                                                                                                                                                                      |                                                                                     |  |  |  |  |  |  |
|                                                                                                                                                                                                                                                               |                                                                                  |                                                                                                                                                                                                                                                                                                                      |                                                                                     |  |  |  |  |  |  |
|                                                                                                                                                                                                                                                               |                                                                                  |                                                                                                                                                                                                                                                                                                                      |                                                                                     |  |  |  |  |  |  |
| 1<br>3                                                                                                                                                                                                                                                        | Other financial or non-financial interests                                       | <input checked="" type="checkbox"/> <b>None</b><br><table border="1" style="width: 100%; border-collapse: collapse;"> <tr><td style="width: 60%; height: 20px;"></td><td style="width: 40%;"></td></tr> <tr><td style="height: 20px;"></td><td></td></tr> <tr><td style="height: 20px;"></td><td></td></tr> </table> |                                                                                     |  |  |  |  |  |  |
|                                                                                                                                                                                                                                                               |                                                                                  |                                                                                                                                                                                                                                                                                                                      |                                                                                     |  |  |  |  |  |  |
|                                                                                                                                                                                                                                                               |                                                                                  |                                                                                                                                                                                                                                                                                                                      |                                                                                     |  |  |  |  |  |  |
|                                                                                                                                                                                                                                                               |                                                                                  |                                                                                                                                                                                                                                                                                                                      |                                                                                     |  |  |  |  |  |  |
| <p><b>Please place an "X" next to the following statement to indicate your agreement:</b></p> <p><input checked="" type="checkbox"/> I certify that I have answered every question and have not altered the wording of any of the questions on this form.</p> |                                                                                  |                                                                                                                                                                                                                                                                                                                      |                                                                                     |  |  |  |  |  |  |

**ICMJE DISCLOSURE FORM**

**Date:** 2022-06-14

**Your Name:** Henrik Zetterberg

**Manuscript Title:** The iterative process of fluid biomarker development and validation in Alzheimer’s disease

**Manuscript number (if known):** DADM-D-22-00095

In the interest of transparency, we ask you to disclose all relationships/activities/interests listed below that are related to the content of your manuscript. “Related” means any relation with for-profit or not-for-profit third parties whose interests may be affected by the content of the manuscript. Disclosure represents a commitment to transparency and does not necessarily indicate a bias. If you are in doubt about whether to list a relationship/activity/interest, it is preferable that you do so.

The following questions apply to the author’s relationships/activities/interests as they relate to the **current manuscript only**.

The author’s relationships/activities/interests should be **defined broadly**. For example, if your manuscript pertains to the epidemiology of hypertension, you should declare all relationships with manufacturers of antihypertensive medication, even if that medication is not mentioned in the manuscript.

In item #1 below, report all support for the work reported in this manuscript without time limit. For all other items, the time frame for disclosure is the past 36 months.

|                                                           |                                                                                                                                         | Name all entities with whom you have this relationship or indicate none (add rows as needed) | Specifications/Comments (e.g., if payments were made to you or to your institution) |
|-----------------------------------------------------------|-----------------------------------------------------------------------------------------------------------------------------------------|----------------------------------------------------------------------------------------------|-------------------------------------------------------------------------------------|
| <b>Time frame: Since the initial planning of the work</b> |                                                                                                                                         |                                                                                              |                                                                                     |
| <b>1</b>                                                  | All support for the present manuscript (e.g., funding, provision of study materials, medical writing, article processing charges, etc.) | <input checked="checked" type="checkbox"/> None                                              |                                                                                     |
|                                                           |                                                                                                                                         |                                                                                              |                                                                                     |
|                                                           |                                                                                                                                         |                                                                                              |                                                                                     |
|                                                           |                                                                                                                                         | <small>Click the tab key to add additional rows</small>                                      |                                                                                     |

|                                   |                                                                          | Name all entities with whom you have this relationship or indicate none (add rows as needed)                                                                                                                                                                                                                                                                                                                                                                                                                                                                                                                                                                                                                                                                                                                           | Specifications/Comments (e.g., if payments were made to you or to your institution) |
|-----------------------------------|--------------------------------------------------------------------------|------------------------------------------------------------------------------------------------------------------------------------------------------------------------------------------------------------------------------------------------------------------------------------------------------------------------------------------------------------------------------------------------------------------------------------------------------------------------------------------------------------------------------------------------------------------------------------------------------------------------------------------------------------------------------------------------------------------------------------------------------------------------------------------------------------------------|-------------------------------------------------------------------------------------|
|                                   | No time limit for this item.                                             |                                                                                                                                                                                                                                                                                                                                                                                                                                                                                                                                                                                                                                                                                                                                                                                                                        |                                                                                     |
| <b>Time frame: past 36 months</b> |                                                                          |                                                                                                                                                                                                                                                                                                                                                                                                                                                                                                                                                                                                                                                                                                                                                                                                                        |                                                                                     |
| 2                                 | Grants or contracts from any entity (if not indicated in item #1 above). | <input type="checkbox"/> <b>None</b>                                                                                                                                                                                                                                                                                                                                                                                                                                                                                                                                                                                                                                                                                                                                                                                   |                                                                                     |
|                                   |                                                                          | <p>HZ is a Wallenberg Scholar supported by grants from the Swedish Research Council (#2018-02532), the European Research Council (#681712), Swedish State Support for Clinical Research (#ALFGBG-720931), the Alzheimer Drug Discovery Foundation (ADDF), USA (#201809-2016862), the AD Strategic Fund and the Alzheimer's Association (#ADSF-21-831376-C, #ADSF-21-831381-C and #ADSF-21-831377-C), the Olav Thon Foundation, the Erling-Persson Family Foundation, Stiftelsen för Gamla Tjänarinnor, Hjärnfonden, Sweden (#FO2019-0228), the European Union's Horizon 2020 research and innovation programme under the Marie Skłodowska-Curie grant agreement No 860197 (MIRIADE), European Union Joint Program for Neurodegenerative Disorders (JPND2021-00694), and the UK Dementia Research Institute at UCL.</p> | Payments made to Instit                                                             |
|                                   |                                                                          |                                                                                                                                                                                                                                                                                                                                                                                                                                                                                                                                                                                                                                                                                                                                                                                                                        |                                                                                     |
|                                   |                                                                          |                                                                                                                                                                                                                                                                                                                                                                                                                                                                                                                                                                                                                                                                                                                                                                                                                        |                                                                                     |
| 3                                 | Royalties or licenses                                                    | <input checked="" type="checkbox"/> <b>None</b>                                                                                                                                                                                                                                                                                                                                                                                                                                                                                                                                                                                                                                                                                                                                                                        |                                                                                     |
|                                   |                                                                          |                                                                                                                                                                                                                                                                                                                                                                                                                                                                                                                                                                                                                                                                                                                                                                                                                        |                                                                                     |
|                                   |                                                                          |                                                                                                                                                                                                                                                                                                                                                                                                                                                                                                                                                                                                                                                                                                                                                                                                                        |                                                                                     |
|                                   |                                                                          |                                                                                                                                                                                                                                                                                                                                                                                                                                                                                                                                                                                                                                                                                                                                                                                                                        |                                                                                     |

|   |                                                                                                              | Name all entities with whom you have this relationship or indicate none (add rows as needed)                                                                                                                                                                        | Specifications/Comments (e.g., if payments were made to you or to your institution) |
|---|--------------------------------------------------------------------------------------------------------------|---------------------------------------------------------------------------------------------------------------------------------------------------------------------------------------------------------------------------------------------------------------------|-------------------------------------------------------------------------------------|
| 4 | Consulting fees                                                                                              | <input type="checkbox"/> <b>None</b>                                                                                                                                                                                                                                |                                                                                     |
|   |                                                                                                              | HZ has served at scientific advisory boards for Abbvie, Alector, Annexon, Artery Therapeutics, AZTherapies, CogRx, Denali, Eisai, Nervgen, Pinteon Therapeutics, Red Abbey Labs, Passage Bio, Roche, Samumed, Siemens Healthineers, Triplet Therapeutics, and Wave. | Payments made to HZ.                                                                |
|   |                                                                                                              |                                                                                                                                                                                                                                                                     |                                                                                     |
|   |                                                                                                              |                                                                                                                                                                                                                                                                     |                                                                                     |
| 5 | Payment or honoraria for lectures, presentations, speakers bureaus, manuscript writing or educational events | <input type="checkbox"/> <b>None</b>                                                                                                                                                                                                                                |                                                                                     |
|   |                                                                                                              | HZ has given lectures in symposia sponsored by Fujirebio, Alzecure, Cellectricon and Biogen.                                                                                                                                                                        | Payments made to HZ.                                                                |
|   |                                                                                                              |                                                                                                                                                                                                                                                                     |                                                                                     |
|   |                                                                                                              |                                                                                                                                                                                                                                                                     |                                                                                     |
| 6 | Payment for expert testimony                                                                                 | <input checked="" type="checkbox"/> <b>None</b>                                                                                                                                                                                                                     |                                                                                     |
|   |                                                                                                              |                                                                                                                                                                                                                                                                     |                                                                                     |
|   |                                                                                                              |                                                                                                                                                                                                                                                                     |                                                                                     |
|   |                                                                                                              |                                                                                                                                                                                                                                                                     |                                                                                     |
| 7 | Support for attending meetings                                                                               | <input checked="" type="checkbox"/> <b>None</b>                                                                                                                                                                                                                     |                                                                                     |
|   |                                                                                                              |                                                                                                                                                                                                                                                                     |                                                                                     |
|   |                                                                                                              |                                                                                                                                                                                                                                                                     |                                                                                     |
|   |                                                                                                              |                                                                                                                                                                                                                                                                     |                                                                                     |

|                                                                                                                                                                                                                                                                     | Name all entities with whom you have this relationship or indicate none (add rows as needed)      | Specifications/Comments (e.g., if payments were made to you or to your institution)                                                                                                                                                                                                                                                                                                                                                                                                                                                          |                                                                                                                                                                                                                                                                     |                      |  |  |  |  |
|---------------------------------------------------------------------------------------------------------------------------------------------------------------------------------------------------------------------------------------------------------------------|---------------------------------------------------------------------------------------------------|----------------------------------------------------------------------------------------------------------------------------------------------------------------------------------------------------------------------------------------------------------------------------------------------------------------------------------------------------------------------------------------------------------------------------------------------------------------------------------------------------------------------------------------------|---------------------------------------------------------------------------------------------------------------------------------------------------------------------------------------------------------------------------------------------------------------------|----------------------|--|--|--|--|
|                                                                                                                                                                                                                                                                     | and/or travel                                                                                     |                                                                                                                                                                                                                                                                                                                                                                                                                                                                                                                                              |                                                                                                                                                                                                                                                                     |                      |  |  |  |  |
| 8                                                                                                                                                                                                                                                                   | Patents planned, issued or pending                                                                | <input checked="" type="checkbox"/> <b>None</b><br><table border="1" data-bbox="472 667 1385 783"> <tr><td></td><td></td></tr> <tr><td></td><td></td></tr> <tr><td></td><td></td></tr> </table>                                                                                                                                                                                                                                                                                                                                              |                                                                                                                                                                                                                                                                     |                      |  |  |  |  |
|                                                                                                                                                                                                                                                                     |                                                                                                   |                                                                                                                                                                                                                                                                                                                                                                                                                                                                                                                                              |                                                                                                                                                                                                                                                                     |                      |  |  |  |  |
|                                                                                                                                                                                                                                                                     |                                                                                                   |                                                                                                                                                                                                                                                                                                                                                                                                                                                                                                                                              |                                                                                                                                                                                                                                                                     |                      |  |  |  |  |
|                                                                                                                                                                                                                                                                     |                                                                                                   |                                                                                                                                                                                                                                                                                                                                                                                                                                                                                                                                              |                                                                                                                                                                                                                                                                     |                      |  |  |  |  |
| 9                                                                                                                                                                                                                                                                   | Participation on a Data Safety Monitoring Board or Advisory Board                                 | <input type="checkbox"/> <b>None</b><br><table border="1" data-bbox="472 884 1385 1262"> <tr> <td data-bbox="472 884 1044 1182">HZ has served at scientific advisory boards for Abbvie, Alector, Annexon, Artery Therapeutics, AZTherapies, CogRx, Denali, Eisai, Nervgen, Pinteon Therapeutics, Red Abbey Labs, Passage Bio, Roche, Samumed, Siemens Healthineers, Triplet Therapeutics, and Wave.</td> <td data-bbox="1044 884 1385 1182">Payments made to HZ.</td> </tr> <tr><td></td><td></td></tr> <tr><td></td><td></td></tr> </table> | HZ has served at scientific advisory boards for Abbvie, Alector, Annexon, Artery Therapeutics, AZTherapies, CogRx, Denali, Eisai, Nervgen, Pinteon Therapeutics, Red Abbey Labs, Passage Bio, Roche, Samumed, Siemens Healthineers, Triplet Therapeutics, and Wave. | Payments made to HZ. |  |  |  |  |
| HZ has served at scientific advisory boards for Abbvie, Alector, Annexon, Artery Therapeutics, AZTherapies, CogRx, Denali, Eisai, Nervgen, Pinteon Therapeutics, Red Abbey Labs, Passage Bio, Roche, Samumed, Siemens Healthineers, Triplet Therapeutics, and Wave. | Payments made to HZ.                                                                              |                                                                                                                                                                                                                                                                                                                                                                                                                                                                                                                                              |                                                                                                                                                                                                                                                                     |                      |  |  |  |  |
|                                                                                                                                                                                                                                                                     |                                                                                                   |                                                                                                                                                                                                                                                                                                                                                                                                                                                                                                                                              |                                                                                                                                                                                                                                                                     |                      |  |  |  |  |
|                                                                                                                                                                                                                                                                     |                                                                                                   |                                                                                                                                                                                                                                                                                                                                                                                                                                                                                                                                              |                                                                                                                                                                                                                                                                     |                      |  |  |  |  |
| 10                                                                                                                                                                                                                                                                  | Leadership or fiduciary role in other board, society, committee or advocacy group, paid or unpaid | <input type="checkbox"/> <b>None</b><br><table border="1" data-bbox="472 1360 1385 1549"> <tr> <td data-bbox="472 1360 1044 1476">HZ is chair of the Alzheimer's Association Global Biomarker Standardization Consortium.</td> <td data-bbox="1044 1360 1385 1476">No payments made.</td> </tr> <tr><td></td><td></td></tr> <tr><td></td><td></td></tr> </table>                                                                                                                                                                             | HZ is chair of the Alzheimer's Association Global Biomarker Standardization Consortium.                                                                                                                                                                             | No payments made.    |  |  |  |  |
| HZ is chair of the Alzheimer's Association Global Biomarker Standardization Consortium.                                                                                                                                                                             | No payments made.                                                                                 |                                                                                                                                                                                                                                                                                                                                                                                                                                                                                                                                              |                                                                                                                                                                                                                                                                     |                      |  |  |  |  |
|                                                                                                                                                                                                                                                                     |                                                                                                   |                                                                                                                                                                                                                                                                                                                                                                                                                                                                                                                                              |                                                                                                                                                                                                                                                                     |                      |  |  |  |  |
|                                                                                                                                                                                                                                                                     |                                                                                                   |                                                                                                                                                                                                                                                                                                                                                                                                                                                                                                                                              |                                                                                                                                                                                                                                                                     |                      |  |  |  |  |



|                                                                                                                                                                                                                                                                    |                                                                                   | <b>Name all entities with whom you have this relationship or indicate none (add rows as needed)</b>                           | <b>Specifications/Comments (e.g., if payments were made to you or to your institution)</b> |
|--------------------------------------------------------------------------------------------------------------------------------------------------------------------------------------------------------------------------------------------------------------------|-----------------------------------------------------------------------------------|-------------------------------------------------------------------------------------------------------------------------------|--------------------------------------------------------------------------------------------|
| <b>1</b><br><b>1</b>                                                                                                                                                                                                                                               | Stock or stock options                                                            | <input type="checkbox"/> <b>None</b>                                                                                          |                                                                                            |
|                                                                                                                                                                                                                                                                    |                                                                                   | HZ is a co-founder of Brain Biomarker Solutions in Gothenburg AB (BBS), which is a part of the GU Ventures Incubator Program. | Payments made to HZ.                                                                       |
|                                                                                                                                                                                                                                                                    |                                                                                   |                                                                                                                               |                                                                                            |
|                                                                                                                                                                                                                                                                    |                                                                                   |                                                                                                                               |                                                                                            |
| <b>1</b><br><b>2</b>                                                                                                                                                                                                                                               | Receipt of equipment , materials, drugs, medical writing, gifts or other services | <input checked="" type="checkbox"/> <b>None</b>                                                                               |                                                                                            |
|                                                                                                                                                                                                                                                                    |                                                                                   |                                                                                                                               |                                                                                            |
|                                                                                                                                                                                                                                                                    |                                                                                   |                                                                                                                               |                                                                                            |
|                                                                                                                                                                                                                                                                    |                                                                                   |                                                                                                                               |                                                                                            |
| <b>1</b><br><b>3</b>                                                                                                                                                                                                                                               | Other financial or non-financial interests                                        | <input checked="" type="checkbox"/> <b>None</b>                                                                               |                                                                                            |
|                                                                                                                                                                                                                                                                    |                                                                                   |                                                                                                                               |                                                                                            |
|                                                                                                                                                                                                                                                                    |                                                                                   |                                                                                                                               |                                                                                            |
|                                                                                                                                                                                                                                                                    |                                                                                   |                                                                                                                               |                                                                                            |
| <p><b>Please place an “X” next to the following statement to indicate your agreement:</b></p> <p>I certify that I have answered every question and have not altered the wording<br/> <input checked="" type="checkbox"/> of any of the questions on this form.</p> |                                                                                   |                                                                                                                               |                                                                                            |
